# Supplementary material
Source: PubMed Central journal article supplement (PMC5666146)
Supplement: AEM.01672-17_zam022178145s1.pdf [file AEM.01672-17_zam022178145s1.pdf]

Supplemental Tables and Figures

**Table S1. Body sites and samples included in study**

| <b>Body Site Symbol</b> | <b>Body Site</b>        | <b>Body Region</b> | <b>Body Environment</b> | <b>Individuals</b>                                         | <b>No. of Individuals</b> | <b>No. of Samples</b> |
|-------------------------|-------------------------|--------------------|-------------------------|------------------------------------------------------------|---------------------------|-----------------------|
| Ac                      | Antecubital fossa       | Arm                | Moist                   | HV02, HV03, HV06, HV07, HV08, HV09, HV11, HV12             | 8                         | 24                    |
| Al                      | Alar crease             | Face               | Sebaceous               | HV01, HV02, HV03, HV04, HV05, HV08, HV09, HV10, HV11, HV12 | 10                        | 30                    |
| Ba                      | Back                    | Torso              | Sebaceous               | HV01, HV02, HV04, HV06, HV08, HV09, HV10, HV11             | 8                         | 24                    |
| Ch                      | Cheek                   | Face               | Sebaceous               | HV01, HV02, HV04, HV09, HV10, HV11, HV12                   | 7                         | 21                    |
| Ea                      | External auditory canal | Ear                | Sebaceous               | HV03, HV04, HV09, HV11, HV12                               | 5                         | 15                    |
| Fh                      | Forehead                | Face               | Sebaceous               | HV01, HV02, HV03, HV08, HV09, HV10, HV11, HV12             | 8                         | 24                    |
| Hp                      | Hypothenar palm         | Hand               | Dry                     | HV01, HV04, HV06, HV07, HV08, HV09, HV10, HV11, HV12       | 9                         | 27                    |
| Ic                      | Inguinal crease         | Inside Hip         | Moist                   | HV01, HV04, HV11, HV12                                     | 4                         | 12                    |
| Id                      | Interdigital web        | Hand               | Moist                   | HV01, HV04, HV08, HV09, HV10, HV11, HV12                   | 7                         | 21                    |
| Mb                      | Manubrium               | Torso              | Sebaceous               | HV01, HV02, HV04, HV05, HV06, HV08, HV09, HV10, HV11, HV12 | 10                        | 30                    |
| Oc                      | Occiput                 | Torso              | Sebaceous               | HV01, HV02, HV03, HV04, HV06, HV08, HV09, HV10, HV11, HV12 | 10                        | 30                    |
| Pc                      | Popliteal fossa         | Leg                | Moist                   | HV08, HV09, HV10, HV11, HV12                               | 5                         | 15                    |
| Ra                      | Retroauricular crease   | Ear                | Sebaceous               | HV01, HV04, HV08, HV09, HV10, HV11, HV12                   | 7                         | 21                    |
| Vf                      | Volar forearm           | Arm                | Dry                     | HV06, HV07, HV08, HV09, HV10, HV11, HV12                   | 7                         | 21                    |

Supplemental Table 2. Supervised learning using *P. acnes* pangenome presence/absence features

| Body Site Symbol | No. of Samples | No. of Individuals | No. of Shared Markers | No. of AttSelect Markers | % Accuracy by Random Chance | RMLR       |              |              |       | 1NN        |              |              |       | RMLR w/AttSelect |              |              |       | 1NN w/AttSelect |              |              |       |
|------------------|----------------|--------------------|-----------------------|--------------------------|-----------------------------|------------|--------------|--------------|-------|------------|--------------|--------------|-------|------------------|--------------|--------------|-------|-----------------|--------------|--------------|-------|
|                  |                |                    |                       |                          |                             | % Accuracy | Lower 95% CI | Upper 95% CI | Ratio | % Accuracy | Lower 95% CI | Upper 95% CI | Ratio | % Accuracy       | Lower 95% CI | Upper 95% CI | Ratio | % Accuracy      | Lower 95% CI | Upper 95% CI | Ratio |
| Ac               | 24             | 8                  | 1173                  | 32                       | 8.70                        | 79.17      | 62.91        | 95.41        | 9.10  | 70.83      | 52.64        | 89.01        | 8.15  | 62.50            | 43.13        | 81.86        | 7.19  | 70.83           | 52.64        | 89.01        | 8.15  |
| Al               | 30             | 10                 | 613                   | 27                       | 6.90                        | 83.33      | 69.99        | 96.66        | 12.08 | 90.00      | 79.26        | 100.70       | 13.05 | 80.00            | 65.68        | 94.31        | 11.60 | 86.67           | 74.50        | 98.83        | 12.57 |
| Ba               | 24             | 8                  | 1505                  | 25                       | 8.70                        | 83.33      | 68.42        | 98.24        | 9.58  | 79.17      | 62.91        | 95.41        | 9.10  | 83.33            | 68.42        | 98.24        | 9.58  | 87.50           | 74.26        | 100.70       | 10.06 |
| Ch               | 21             | 7                  | 901                   | 19                       | 10.00                       | 80.95      | 64.15        | 97.74        | 8.10  | 76.19      | 57.97        | 94.40        | 7.62  | 61.90            | 41.13        | 82.67        | 6.19  | 85.71           | 70.74        | 100.60       | 8.57  |
| Ea               | 15             | 5                  | 551                   | 13                       | 14.29                       | 66.67      | 42.81        | 90.52        | 4.67  | 60.00      | 35.20        | 84.79        | 4.20  | 53.33            | 28.08        | 78.58        | 3.73  | 60.00           | 35.20        | 84.79        | 4.20  |
| Fh               | 24             | 8                  | 1047                  | 19                       | 8.70                        | 79.17      | 62.91        | 95.41        | 9.10  | 79.17      | 62.91        | 95.41        | 9.10  | 54.17            | 34.23        | 74.10        | 6.23  | 66.67           | 47.80        | 85.52        | 7.67  |
| Hp               | 27             | 9                  | 1228                  | 39                       | 7.69                        | 77.78      | 62.09        | 93.45        | 10.11 | 96.30      | 89.17        | 103.40       | 12.52 | 81.48            | 66.82        | 96.13        | 10.59 | 96.30           | 89.17        | 103.40       | 12.52 |
| Ic               | 12             | 4                  | 1073                  | 9                        | 18.18                       | 75.00      | 50.50        | 99.49        | 4.13  | 58.33      | 30.43        | 86.22        | 3.21  | 83.33            | 62.24        | 104.40       | 4.58  | 50.00           | 21.71        | 78.28        | 2.75  |
| Id               | 21             | 7                  | 949                   | 27                       | 10.00                       | 66.67      | 46.50        | 86.82        | 6.67  | 90.48      | 77.92        | 103.03       | 9.05  | 95.24            | 86.12        | 104.30       | 9.52  | 95.24           | 86.12        | 104.30       | 9.52  |
| Mb               | 30             | 10                 | 1646                  | 24                       | 6.90                        | 86.67      | 74.50        | 98.83        | 12.57 | 93.33      | 84.40        | 102.20       | 13.53 | 70.00            | 53.60        | 86.39        | 10.15 | 90.00           | 79.26        | 100.70       | 13.05 |
| Oc               | 30             | 10                 | 1547                  | 28                       | 6.90                        | 83.33      | 69.99        | 96.66        | 12.08 | 80.00      | 65.68        | 94.31        | 11.60 | 83.33            | 69.99        | 96.66        | 12.08 | 86.67           | 74.50        | 98.83        | 12.57 |
| Pc               | 15             | 5                  | 1142                  | 28                       | 14.29                       | 73.33      | 50.95        | 95.71        | 5.13  | 80.00      | 59.75        | 100.20       | 5.60  | 86.67            | 69.46        | 103.80       | 6.07  | 93.33           | 80.70        | 105.90       | 6.53  |
| Ra               | 21             | 7                  | 981                   | 24                       | 10.00                       | 80.95      | 64.15        | 97.74        | 8.10  | 85.71      | 70.74        | 100.60       | 8.57  | 80.95            | 64.15        | 97.74        | 8.10  | 80.95           | 64.15        | 97.74        | 8.10  |
| Vf               | 21             | 7                  | 1160                  | 28                       | 10.00                       | 95.24      | 86.12        | 104.30       | 9.52  | 90.48      | 77.92        | 103.03       | 9.05  | 95.24            | 86.12        | 104.30       | 9.52  | 90.48           | 77.92        | 103.00       | 9.05  |

AttSelect = Attribute Selection

**Table S3. Supervised learning using nucleotide diversity of shared clade-specific markers**

| Body Site Symbol | No. of Samples | No. of Individuals | No. of Shared Markers | No. of AttSelect Markers | % Accuracy by Random Chance | RMLR       |              |              |       | 1NN        |              |              |       | RMLR w/AttSelect |              |              |       | 1NN w/AttSelect |              |              |       |
|------------------|----------------|--------------------|-----------------------|--------------------------|-----------------------------|------------|--------------|--------------|-------|------------|--------------|--------------|-------|------------------|--------------|--------------|-------|-----------------|--------------|--------------|-------|
|                  |                |                    |                       |                          |                             | % Accuracy | Lower 95% CI | Upper 95% CI | Ratio | % Accuracy | Lower 95% CI | Upper 95% CI | Ratio | % Accuracy       | Lower 95% CI | Upper 95% CI | Ratio | % Accuracy      | Lower 95% CI | Upper 95% CI | Ratio |
| Ac               | 24             | 8                  | 242                   | 27                       | 8.70                        | 83.33      | 68.42        | 98.24        | 9.58  | 70.83      | 52.64        | 89.01        | 8.15  | 75.00            | 57.67        | 92.32        | 8.63  | 83.33           | 68.42        | 98.24        | 9.58  |
| Al               | 30             | 10                 | 260                   | 42                       | 6.90                        | 83.33      | 69.99        | 96.66        | 12.08 | 56.67      | 38.93        | 74.39        | 8.22  | 83.33            | 69.99        | 96.66        | 12.08 | 70.00           | 53.60        | 86.39        | 10.15 |
| Ba               | 24             | 8                  | 252                   | 30                       | 8.70                        | 95.83      | 87.83        | 103.80       | 11.02 | 79.17      | 62.91        | 95.41        | 9.10  | 83.33            | 68.42        | 98.24        | 9.58  | 87.50           | 74.26        | 100.70       | 10.06 |
| Ch               | 21             | 7                  | 252                   | 31                       | 10.00                       | 100.00     | 100.00       | 100.00       | 10.00 | 90.48      | 77.92        | 103.00       | 9.05  | 90.48            | 77.92        | 103.00       | 9.05  | 100.00          | 100.00       | 100.00       | 10.00 |
| Ea               | 15             | 5                  | 249                   | 26                       | 14.29                       | 86.67      | 69.46        | 103.80       | 6.07  | 66.67      | 42.81        | 90.52        | 4.67  | 66.67            | 42.81        | 90.52        | 4.67  | 60.00           | 35.20        | 84.79        | 4.20  |
| Fh               | 24             | 8                  | 253                   | 37                       | 8.70                        | 95.83      | 87.83        | 103.80       | 11.02 | 75.00      | 57.67        | 92.32        | 8.63  | 87.50            | 74.26        | 100.70       | 10.06 | 87.50           | 74.26        | 100.70       | 10.06 |
| Hp               | 27             | 9                  | 255                   | 47                       | 7.69                        | 92.59      | 82.71        | 102.40       | 12.04 | 96.30      | 89.17        | 103.40       | 12.52 | 96.30            | 89.17        | 103.40       | 12.52 | 92.59           | 82.71        | 102.40       | 12.04 |
| Ic               | 12             | 4                  | 336                   | 22                       | 18.18                       | 66.67      | 39.99        | 93.33        | 3.67  | 100.00     | 100.00       | 100.00       | 5.50  | 83.33            | 62.24        | 104.40       | 4.58  | 75.00           | 50.50        | 99.49        | 4.13  |
| Id               | 21             | 7                  | 254                   | 36                       | 10.00                       | 95.24      | 86.12        | 104.30       | 9.52  | 85.71      | 70.74        | 100.60       | 8.57  | 90.48            | 77.92        | 103.03       | 9.05  | 95.24           | 86.12        | 104.30       | 9.52  |
| Mb               | 30             | 10                 | 239                   | 47                       | 6.90                        | 93.33      | 84.40        | 102.20       | 13.53 | 90.00      | 79.26        | 100.70       | 13.05 | 90.00            | 79.26        | 100.70       | 13.05 | 96.67           | 90.24        | 103.00       | 14.02 |
| Oc               | 30             | 10                 | 242                   | 32                       | 6.90                        | 83.33      | 69.99        | 96.66        | 12.08 | 73.33      | 57.50        | 89.15        | 10.63 | 86.67            | 74.50        | 98.83        | 12.57 | 73.33           | 57.50        | 89.15        | 10.63 |
| Pc               | 15             | 5                  | 344                   | 14                       | 14.29                       | 73.33      | 50.95        | 95.71        | 5.13  | 100.00     | 100.00       | 100.00       | 7.00  | 80.00            | 59.75        | 100.20       | 5.60  | 80.00           | 59.75        | 100.20       | 5.60  |
| Ra               | 21             | 7                  | 256                   | 28                       | 10.00                       | 76.19      | 57.97        | 94.40        | 7.62  | 76.19      | 57.97        | 94.40        | 7.62  | 80.95            | 64.15        | 97.74        | 8.10  | 80.95           | 64.15        | 97.74        | 8.10  |
| Vf               | 21             | 7                  | 253                   | 34                       | 10.00                       | 95.24      | 86.12        | 104.30       | 9.52  | 90.48      | 77.92        | 103.03       | 9.05  | 85.71            | 70.74        | 100.60       | 8.57  | 90.48           | 77.92        | 103.00       | 9.05  |

AttSelect = Attribute Selection

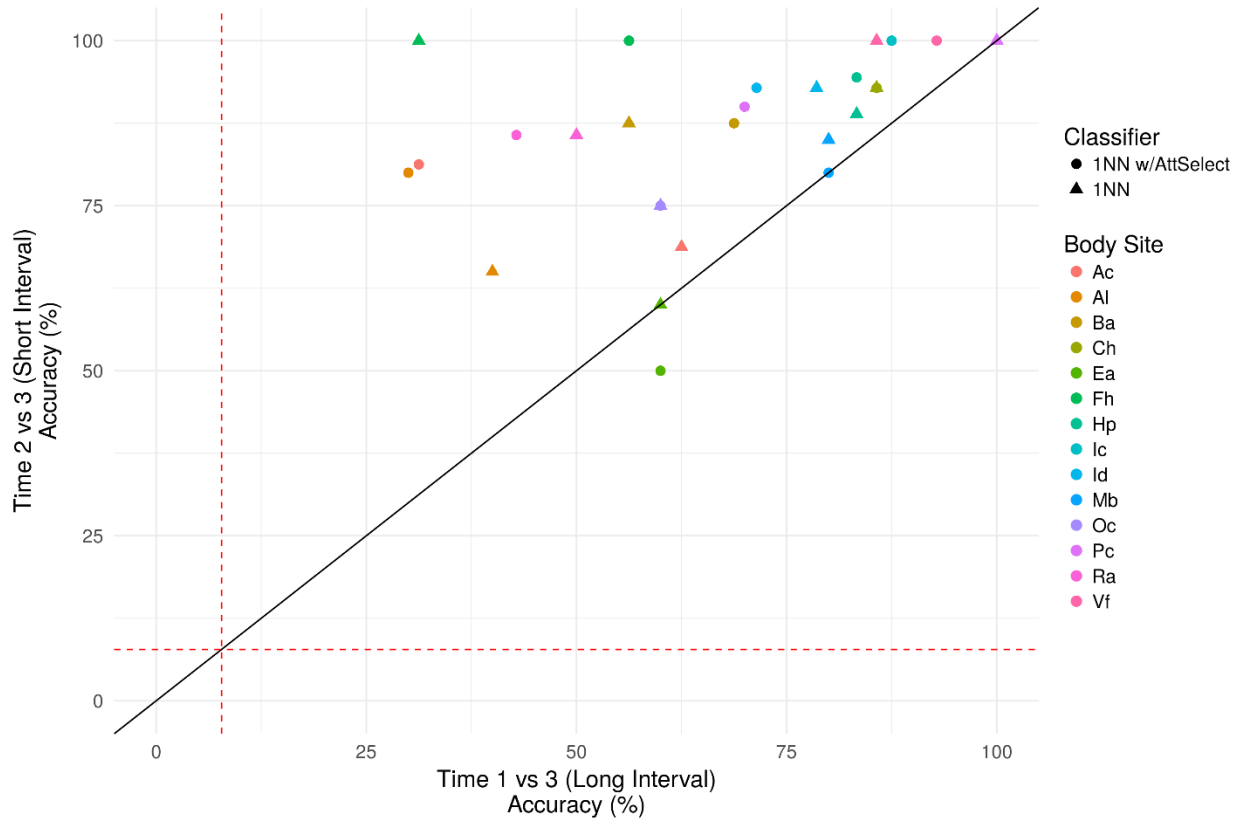

**Figure S1.** Comparison of 1-nearest-neighbor (1NN) classification accuracies, using leave-one-out cross validation, using the nucleotide diversities of clade-specific markers shared by all individuals from long (> 2.5 years) and short (5-10 weeks) sampling time intervals at 14 skin body sites. Red dashed lines represent the average predictive accuracy by random chance (7.8%).

**Table S4. Selected features from all body sites using correlation-based feature selection**

| Feature                                              | Taxonomic Clade                    | Level      | Marker Length | Body Sites           |
|------------------------------------------------------|------------------------------------|------------|---------------|----------------------|
| gi 512466269 ref NZ_KE150404.1 :c2352553-2351375     | Corynebacterium_sp_HFH0082         | Species    | 1179          | Pc                   |
| gi 552867507 ref NZ_KI515768.1 :184972-186138        | Corynebacterium_tuberculostearicum | Species    | 1167          | Pc                   |
| gi 417931402 ref NZ_AFUN01000007.1 :c97233-97075     | GCF_000221145                      | Subspecies | 159           | Vf                   |
| gi 417933187 ref NZ_AFUN01000043.1 :4929-5147        | GCF_000221145                      | Subspecies | 219           | Ra                   |
| gi 417932374 ref NZ_AFUN01000032.1 :143771-144007    | GCF_000221145                      | Subspecies | 237           | Vf                   |
| gi 335055158 ref NZ_AFIL01000073.1 :77143-77310      | Propionibacteriaceae               | Family     | 168           | Ba,Ch,Fh,Hp,Mb,Oc,Vf |
| gi 552896688 ref NZ_AXMI01000003.1 :c72034-71849     | Propionibacteriaceae               | Family     | 186           | Al,Mb                |
| gi 552891898 ref NZ_AXMG01000001.1 :c1945194-1944973 | Propionibacteriaceae               | Family     | 222           | Ac,Fh,Mb,Oc          |
| gi 552904108 ref NZ_KI518468.1 :464070-464315        | Propionibacteriaceae               | Family     | 246           | Ch,Hp,Id,Mb          |
| gi 342211239 ref NZ_AFUK01000001.1 :c359834-359544   | Propionibacteriaceae               | Family     | 291           | Ac,Al,Mb             |
| gi 335053539 ref NZ_AFIL01000025.1 :23315-23623      | Propionibacteriaceae               | Family     | 309           | Al,Ra,Vf             |
| gi 335050656 ref NZ_AFIK01000017.1 :c30516-30079     | Propionibacteriaceae               | Family     | 438           | Al,Ba,Ea             |
| gi 552879811 ref NZ_AXME01000001.1 :c2014536-2014075 | Propionibacteriaceae               | Family     | 462           | Ra                   |
| gi 355707189 ref NZ_JH376566.1 :c170886-169537       | Propionibacteriaceae               | Family     | 1350          | Ch,Ea,Fh,Ra          |
| gi 422496709 ref NZ_GL383802.1 :56803-56916          | Propionibacterium_acnes            | Species    | 114           | Ea,Hp,Mb,Oc,Ra       |
| gi 552876815 ref NZ_KI515686.1 :c642879-642748       | Propionibacterium_acnes            | Species    | 132           | Ea                   |
| gi 335050697 ref NZ_AFIK01000020.1 :c12439-12299     | Propionibacterium_acnes            | Species    | 141           | Ea                   |
| gi 335053685 ref NZ_AFIL01000030.1 :c57253-57113     | Propionibacterium_acnes            | Species    | 141           | Al,Pc                |
| gi 552895565 ref NZ_AXMI01000001.1 :c94830-94675     | Propionibacterium_acnes            | Species    | 156           | Vf                   |
| gi 422539030 ref NZ_GL384611.1 :c783227-783054       | Propionibacterium_acnes            | Species    | 174           | Ra                   |
| gi 552875787 ref NZ_KI515684.1 :c325537-325361       | Propionibacterium_acnes            | Species    | 177           | Ac,Fh,Oc,Vf          |
| gi 552891898 ref NZ_AXMG01000001.1 :99114-99290      | Propionibacterium_acnes            | Species    | 177           | Ac,Al,Hp             |
| gi 355707384 ref NZ_JH376567.1 :c400475-400284       | Propionibacterium_acnes            | Species    | 192           | Hp,Mb                |
| gi 552875787 ref NZ_KI515684.1 :c488989-488798       | Propionibacterium_acnes            | Species    | 192           | Ba,Ic,Oc             |
| gi 335052413 ref NZ_AFIK01000085.1 :c27721-27527     | Propionibacterium_acnes            | Species    | 195           | Id,Pc                |
| gi 355707384 ref NZ_JH376567.1 :592116-592328        | Propionibacterium_acnes            | Species    | 213           | Al,Ba,Fh             |
| gi 342211239 ref NZ_AFUK01000001.1 :535213-535428    | Propionibacterium_acnes            | Species    | 216           | Ba,Ea,Hp,Id          |
| gi 342211239 ref NZ_AFUK01000001.1 :c1376325-1376110 | Propionibacterium_acnes            | Species    | 216           | Mb                   |
| gi 342211239 ref NZ_AFUK01000001.1 :2069064-2069282  | Propionibacterium_acnes            | Species    | 219           | Ic                   |
| gi 552876418 ref NZ_KI515685.1 :c157510-157292       | Propionibacterium_acnes            | Species    | 219           | Ac                   |
| gi 422500804 ref NZ_GL383759.1 :c166532-166311       | Propionibacterium_acnes            | Species    | 222           | Ac,Ba,Fh,Hp,Ra,Vf    |
| gi 482889214 ref NC_021085.1 :654926-655153          | Propionibacterium_acnes            | Species    | 228           | Ic,Mb                |
| gi 355707189 ref NZ_JH376566.1 :326756-326986        | Propionibacterium_acnes            | Species    | 231           | Ac,Fh,Pc,Vf          |
| gi 335054657 ref NZ_AFIL01000058.1 :28786-29034      | Propionibacterium_acnes            | Species    | 249           | Ac,Al,Fh,Id,Oc,Ra    |
| gi 552876418 ref NZ_KI515685.1 :133418-133666        | Propionibacterium_acnes            | Species    | 249           | Fh,Hp                |
| gi 552879811 ref NZ_AXME01000001.1 :1128888-1129136  | Propionibacterium_acnes            | Species    | 249           | Ac,Al                |
| gi 552879811 ref NZ_AXME01000001.1 :c1599141-1598893 | Propionibacterium_acnes            | Species    | 249           | Mb                   |

|                                                      |                         |         |     |             |
|------------------------------------------------------|-------------------------|---------|-----|-------------|
| gi 552891898 ref NZ_AXMG01000001.1 :1440218-1440469  | Propionibacterium_acnes | Species | 252 | Mb          |
| gi 552891898 ref NZ_AXMG01000001.1 :1877095-1877379  | Propionibacterium_acnes | Species | 285 | Al,Hp       |
| gi 422434141 ref NZ_GL384222.1 :86635-86934          | Propionibacterium_acnes | Species | 300 | Al,Id       |
| gi 552879811 ref NZ_AXME01000001.1 :702826-703131    | Propionibacterium_acnes | Species | 306 | Ac,Mb       |
| gi 342211239 ref NZ_AFUK01000001.1 :2001142-2001459  | Propionibacterium_acnes | Species | 318 | Vf          |
| gi 422482616 ref NZ_GL383714.1 :170052-170369        | Propionibacterium_acnes | Species | 318 | Fh,Mb,Ra    |
| gi 335051382 ref NZ_AFIK01000053.1 :c47134-46805     | Propionibacterium_acnes | Species | 330 | Oc          |
| gi 335051798 ref NZ_AFIK01000065.1 :c4330-4001       | Propionibacterium_acnes | Species | 330 | Ac          |
| gi 342211239 ref NZ_AFUK01000001.1 :c1845075-1844710 | Propionibacterium_acnes | Species | 366 | Ch,Hp,Mb    |
| gi 355707384 ref NZ_JH376567.1 :621102-621467        | Propionibacterium_acnes | Species | 366 | Al,Hp       |
| gi 552875787 ref NZ_KI515684.1 :c584270-583890       | Propionibacterium_acnes | Species | 381 | Al,Oc       |
| gi 335050749 ref NZ_AFIK01000022.1 :c35390-34998     | Propionibacterium_acnes | Species | 393 | Ea          |
| gi 552891898 ref NZ_AXMG01000001.1 :c1460921-1460529 | Propionibacterium_acnes | Species | 393 | Ea          |
| gi 552891898 ref NZ_AXMG01000001.1 :793445-793843    | Propionibacterium_acnes | Species | 399 | Ac          |
| gi 552891898 ref NZ_AXMG01000001.1 :c2382295-2381897 | Propionibacterium_acnes | Species | 399 | Oc          |
| gi 355707384 ref NZ_JH376567.1 :c388018-387605       | Propionibacterium_acnes | Species | 414 | Al,Ch,Fh    |
| gi 552879811 ref NZ_AXME01000001.1 :49241-49654      | Propionibacterium_acnes | Species | 414 | Ic          |
| gi 552879811 ref NZ_AXME01000001.1 :c550719-550297   | Propionibacterium_acnes | Species | 423 | Al,Pc       |
| gi 552876418 ref NZ_KI515685.1 :c713438-713010       | Propionibacterium_acnes | Species | 429 | Hp          |
| gi 552876418 ref NZ_KI515685.1 :910-1341             | Propionibacterium_acnes | Species | 432 | Ic          |
| gi 552891898 ref NZ_AXMG01000001.1 :834824-835255    | Propionibacterium_acnes | Species | 432 | Id          |
| gi 355707384 ref NZ_JH376567.1 :190789-191232        | Propionibacterium_acnes | Species | 444 | Al          |
| gi 552902020 ref NZ_AXMK01000001.1 :c1228696-1228250 | Propionibacterium_acnes | Species | 447 | Oc          |
| gi 552876418 ref NZ_KI515685.1 :656232-656693        | Propionibacterium_acnes | Species | 462 | Mb          |
| gi 552879811 ref NZ_AXME01000001.1 :c1651715-1651248 | Propionibacterium_acnes | Species | 468 | Id          |
| gi 552895565 ref NZ_AXMI01000001.1 :619555-620031    | Propionibacterium_acnes | Species | 477 | Ra          |
| gi 552891898 ref NZ_AXMG01000001.1 :c1328090-1327596 | Propionibacterium_acnes | Species | 495 | Oc          |
| gi 552876418 ref NZ_KI515685.1 :c1014617-1014117     | Propionibacterium_acnes | Species | 501 | Mb,Ra       |
| gi 552896371 ref NZ_AXMI01000002.1 :319095-319601    | Propionibacterium_acnes | Species | 507 | Ba,Hp,Ic    |
| gi 422439172 ref NZ_GL384485.1 :c80610-80086         | Propionibacterium_acnes | Species | 525 | Ac,Ba       |
| gi 552895565 ref NZ_AXMI01000001.1 :c29469-28930     | Propionibacterium_acnes | Species | 540 | Ea          |
| gi 552896688 ref NZ_AXMI01000003.1 :232201-232740    | Propionibacterium_acnes | Species | 540 | Ba          |
| gi 552896688 ref NZ_AXMI01000003.1 :c38494-37955     | Propionibacterium_acnes | Species | 540 | Ch          |
| gi 552891898 ref NZ_AXMG01000001.1 :592123-592665    | Propionibacterium_acnes | Species | 543 | Fh,Ic       |
| gi 552876418 ref NZ_KI515685.1 :36713-37258          | Propionibacterium_acnes | Species | 546 | Ac          |
| gi 552879811 ref NZ_AXME01000001.1 :c1657647-1657093 | Propionibacterium_acnes | Species | 555 | Hp,Mb,Oc,Pc |

|                                                      |                         |         |     |                |
|------------------------------------------------------|-------------------------|---------|-----|----------------|
| gi 552897201 ref NZ_AXMI01000004.1 :c231437-230883   | Propionibacterium_acnes | Species | 555 | Fh             |
| gi 342211239 ref NZ_AFUK01000001.1 :c1715790-1715233 | Propionibacterium_acnes | Species | 558 | Ba,Mb          |
| gi 552879811 ref NZ_AXME01000001.1 :c2447430-2446870 | Propionibacterium_acnes | Species | 561 | Ic             |
| gi 552875787 ref NZ_KI515684.1 :c96934-96368         | Propionibacterium_acnes | Species | 567 | Al             |
| gi 552879811 ref NZ_AXME01000001.1 :587256-587825    | Propionibacterium_acnes | Species | 570 | Ac,Pc          |
| gi 552876815 ref NZ_KI515686.1 :613740-614315        | Propionibacterium_acnes | Species | 576 | Ba             |
| gi 295129529 ref NC_014039.1 :c1439020-1438442       | Propionibacterium_acnes | Species | 579 | Ch,Ic          |
| gi 355708280 ref NZ_JH376568.1 :c255689-255105       | Propionibacterium_acnes | Species | 585 | Vf             |
| gi 552895565 ref NZ_AXMI01000001.1 :c325088-324501   | Propionibacterium_acnes | Species | 588 | Ch,Vf          |
| gi 355707189 ref NZ_JH376566.1 :507019-507612        | Propionibacterium_acnes | Species | 594 | Ac,Ic          |
| gi 335053761 ref NZ_AFIL01000031.1 :46041-46637      | Propionibacterium_acnes | Species | 597 | Hp,Id          |
| gi 422499020 ref NZ_GL383811.1 :10443-11039          | Propionibacterium_acnes | Species | 597 | Hp,Mb,Oc       |
| gi 552896371 ref NZ_AXMI01000002.1 :674988-675587    | Propionibacterium_acnes | Species | 600 | Al,Oc          |
| gi 552891898 ref NZ_AXMG01000001.1 :c1443707-1443105 | Propionibacterium_acnes | Species | 603 | Id,Mb          |
| gi 552896371 ref NZ_AXMI01000002.1 :638332-638937    | Propionibacterium_acnes | Species | 606 | Id,Oc          |
| gi 335050542 ref NZ_AFIK01000013.1 :c12739-12119     | Propionibacterium_acnes | Species | 621 | Ic             |
| gi 552879811 ref NZ_AXME01000001.1 :1327950-1328573  | Propionibacterium_acnes | Species | 624 | Hp,Oc,Vf       |
| gi 355708280 ref NZ_JH376568.1 :c185858-185226       | Propionibacterium_acnes | Species | 633 | Ba,Ea,Vf       |
| gi 422388755 ref NZ_GL878472.1 :c178957-178325       | Propionibacterium_acnes | Species | 633 | Ch             |
| gi 552895565 ref NZ_AXMI01000001.1 :c282323-281691   | Propionibacterium_acnes | Species | 633 | Al,Mb,Ra       |
| gi 552895565 ref NZ_AXMI01000001.1 :c306684-306040   | Propionibacterium_acnes | Species | 645 | Id,Pc          |
| gi 422386402 ref NZ_GL878455.1 :c812899-812252       | Propionibacterium_acnes | Species | 648 | Ac,Ch,Fh,Hp,Id |
| gi 552876418 ref NZ_KI515685.1 :187493-188140        | Propionibacterium_acnes | Species | 648 | Ch             |
| gi 417929021 ref NZ_AFUM01000003.1 :557611-558279    | Propionibacterium_acnes | Species | 669 | Ea             |
| gi 552876815 ref NZ_KI515686.1 :c50594-49899         | Propionibacterium_acnes | Species | 696 | Ac,Hp,Id,Vf    |
| gi 355707189 ref NZ_JH376566.1 :882552-883256        | Propionibacterium_acnes | Species | 705 | Mb             |
| gi 355707384 ref NZ_JH376567.1 :251291-251998        | Propionibacterium_acnes | Species | 708 | Ch,Id,Mb       |
| gi 342211239 ref NZ_AFUK01000001.1 :c1579497-1578787 | Propionibacterium_acnes | Species | 711 | Hp,Ic          |
| gi 342211239 ref NZ_AFUK01000001.1 :1588290-1589009  | Propionibacterium_acnes | Species | 720 | Hp             |
| gi 552897201 ref NZ_AXMI01000004.1 :48085-48816      | Propionibacterium_acnes | Species | 732 | Ch,Mb,Ra       |
| gi 335055061 ref NZ_AFIL01000070.1 :3643-4386        | Propionibacterium_acnes | Species | 744 | Vf             |
| gi 552876815 ref NZ_KI515686.1 :c586091-585333       | Propionibacterium_acnes | Species | 759 | Al,Ic          |
| gi 422512600 ref NZ_GL383846.1 :26161-26922          | Propionibacterium_acnes | Species | 762 | Mb             |
| gi 552891898 ref NZ_AXMG01000001.1 :1150303-1151070  | Propionibacterium_acnes | Species | 768 | Hp,Ic,Pc,Ra    |
| gi 552875787 ref NZ_KI515684.1 :459339-460115        | Propionibacterium_acnes | Species | 777 | Al,Fh          |
| gi 552896371 ref NZ_AXMI01000002.1 :c247178-246402   | Propionibacterium_acnes | Species | 777 | Mb             |
| gi 422392301 ref NZ_GL883048.1 :64439-65218          | Propionibacterium_acnes | Species | 780 | Vf             |
| gi 335052272 ref NZ_AFIK01000082.1 :c111360-110575   | Propionibacterium_acnes | Species | 786 | Al             |
| gi 552876418 ref NZ_KI515685.1 :c849089-848304       | Propionibacterium_acnes | Species | 786 | Id             |

|                                                      |                             |         |      |                         |
|------------------------------------------------------|-----------------------------|---------|------|-------------------------|
| gi 342211239 ref NZ_AFUK01000001.1 :1851240-1852028  | Propionibacterium_acnes     | Species | 789  | Ac,Id                   |
| gi 335055047 ref NZ_AFIL01000069.1 :c9632-8838       | Propionibacterium_acnes     | Species | 795  | Ic,Id,Pc                |
| gi 387502364 ref NC_017535.1 :c1339878-1339075       | Propionibacterium_acnes     | Species | 804  | Hp,Id                   |
| gi 335050601 ref NZ_AFIK01000014.1 :315-1133         | Propionibacterium_acnes     | Species | 819  | Ic                      |
| gi 552879811 ref NZ_AXME01000001.1 :368977-369813    | Propionibacterium_acnes     | Species | 837  | Al,Hp,Ic                |
| gi 552896371 ref NZ_AXMI01000002.1 :721564-722400    | Propionibacterium_acnes     | Species | 837  | Ch,Ic                   |
| gi 552879811 ref NZ_AXME01000001.1 :97330-98208      | Propionibacterium_acnes     | Species | 879  | Mb                      |
| gi 422423570 ref NZ_GL384259.1 :c300859-299957       | Propionibacterium_acnes     | Species | 903  | Fh,Hp,Ic                |
| gi 552879811 ref NZ_AXME01000001.1 :40840-41742      | Propionibacterium_acnes     | Species | 903  | Ac,Ba,Oc                |
| gi 552891898 ref NZ_AXMG01000001.1 :c2312839-2311925 | Propionibacterium_acnes     | Species | 915  | Al,Ch,Hp,Id             |
| gi 342211239 ref NZ_AFUK01000001.1 :527724-528653    | Propionibacterium_acnes     | Species | 930  | Al,Hp                   |
| gi 355708440 ref NZ_JH376569.1 :c80380-79448         | Propionibacterium_acnes     | Species | 933  | Mb                      |
| gi 422538210 ref NZ_GL384610.1 :c285619-284684       | Propionibacterium_acnes     | Species | 936  | Hp                      |
| gi 355707189 ref NZ_JH376566.1 :1026577-1027557      | Propionibacterium_acnes     | Species | 981  | Hp                      |
| gi 552876418 ref NZ_KI515685.1 :432422-433465        | Propionibacterium_acnes     | Species | 1044 | Ba,Fh                   |
| gi 355707384 ref NZ_JH376567.1 :90374-91453          | Propionibacterium_acnes     | Species | 1080 | Ac,Ba,Ch,Ea,Fh,Id,Mb,Vf |
| gi 552879811 ref NZ_AXME01000001.1 :1265476-1266570  | Propionibacterium_acnes     | Species | 1095 | Ac,Ea                   |
| gi 552895565 ref NZ_AXMI01000001.1 :c443438-442323   | Propionibacterium_acnes     | Species | 1116 | Pc                      |
| gi 335050281 ref NZ_AFIK01000001.1 :c2940-1807       | Propionibacterium_acnes     | Species | 1134 | Ac,Al,Ch,Fh,Hp,Oc,Ra    |
| gi 422552858 ref NZ_GL383469.1 :c216727-215501       | Propionibacterium_acnes     | Species | 1227 | Fh,Hp,Mb                |
| gi 552896371 ref NZ_AXMI01000002.1 :c671938-670697   | Propionibacterium_acnes     | Species | 1242 | Mb,Pc                   |
| gi 552879811 ref NZ_AXME01000001.1 :c2135959-2134715 | Propionibacterium_acnes     | Species | 1245 | Ic                      |
| gi 335051382 ref NZ_AFIK01000053.1 :c36245-34977     | Propionibacterium_acnes     | Species | 1269 | Ch,Ea,Ra                |
| gi 342211239 ref NZ_AFUK01000001.1 :593413-594699    | Propionibacterium_acnes     | Species | 1287 | Al,Id                   |
| gi 552897201 ref NZ_AXMI01000004.1 :c577292-575922   | Propionibacterium_acnes     | Species | 1371 | Al,Mb                   |
| gi 552876815 ref NZ_KI515686.1 :c200743-199319       | Propionibacterium_acnes     | Species | 1425 | Ba,Fh,Hp,Id,Oc,Vf       |
| gi 552902190 ref NZ_AXML01000004.1 :c579659-578172   | Propionibacterium_acnes     | Species | 1488 | Ea                      |
| gi 552876418 ref NZ_KI515685.1 :c1032381-1030873     | Propionibacterium_acnes     | Species | 1509 | Oc,Ra                   |
| gi 335051081 ref NZ_AFIK01000036.1 :c1716-193        | Propionibacterium_acnes     | Species | 1524 | Id,Mb                   |
| gi 335053104 ref NZ_AFIL01000010.1 :c33862-32210     | Propionibacterium_acnes     | Species | 1653 | Al,Ch,Fh,Hp,Mb,Oc,Ra,Vf |
| gi 395203852 ref NZ_AFAM01000006.1 :c75652-75533     | Propionibacterium_humerusii | Species | 120  | Hp,Vf                   |
| gi 395205346 ref NZ_AFAM01000017.1 :c304806-304684   | Propionibacterium_humerusii | Species | 123  | Ba,Ea,Hp,Ra,Vf          |
| gi 395203690 ref NZ_AFAM01000005.1 :c52756-52631     | Propionibacterium_humerusii | Species | 126  | Ba,Ch,Ea,Fh,Hp,Mb       |
| gi 395205346 ref NZ_AFAM01000017.1 :477016-477147    | Propionibacterium_humerusii | Species | 132  | Ch,Oc                   |
| gi 395206455 ref NZ_AFAM01000020.1 :c4555-4424       | Propionibacterium_humerusii | Species | 132  | Al,Fh                   |
| gi 395206111 ref NZ_AFAM01000018.1 :226375-226509    | Propionibacterium_humerusii | Species | 135  | Vf                      |
| gi 395204147 ref NZ_AFAM01000008.1 :231579-231755    | Propionibacterium_humerusii | Species | 177  | Al,Ba,Hp,Vf             |



|                                                      |                                 |         |      |                            |
|------------------------------------------------------|---------------------------------|---------|------|----------------------------|
| gi 395205131 ref NZ_AFAM01000014.1 :c69464-69276     | Propionibacterium_humerusii     | Species | 189  | Fh,Oc                      |
| gi 395203469 ref NZ_AFAM01000002.1 :37393-37605      | Propionibacterium_humerusii     | Species | 213  | Ac,Fh,Ra,Vf                |
| gi 395203690 ref NZ_AFAM01000005.1 :c111259-111038   | Propionibacterium_humerusii     | Species | 222  | Ba,Fh,Mb                   |
| gi 395204147 ref NZ_AFAM01000008.1 :c721415-721191   | Propionibacterium_humerusii     | Species | 225  | Ch                         |
| gi 395205346 ref NZ_AFAM01000017.1 :12091-12363      | Propionibacterium_humerusii     | Species | 273  | Al,Ch,Ic,Id,Vf             |
| gi 395203061 ref NZ_AFAM01000001.1 :c312862-312554   | Propionibacterium_humerusii     | Species | 309  | Hp,Id,Oc                   |
| gi 395203852 ref NZ_AFAM01000006.1 :75953-76378      | Propionibacterium_humerusii     | Species | 426  | Ba,Fh                      |
| gi 395205346 ref NZ_AFAM01000017.1 :c476952-476512   | Propionibacterium_humerusii     | Species | 441  | Id                         |
| gi 395203852 ref NZ_AFAM01000006.1 :c137365-136916   | Propionibacterium_humerusii     | Species | 450  | Al,Ba,Ch,Ea,Fh,Hp,Mb,Oc,Ra |
| gi 395205346 ref NZ_AFAM01000017.1 :c43269-42787     | Propionibacterium_humerusii     | Species | 483  | Ea,Ic                      |
| gi 395203852 ref NZ_AFAM01000006.1 :193159-193779    | Propionibacterium_humerusii     | Species | 621  | Al,Ba,Ch,Hp,Mb,Vf          |
| gi 395203061 ref NZ_AFAM01000001.1 :c260639-259980   | Propionibacterium_humerusii     | Species | 660  | Ch,Ea                      |
| gi 395205131 ref NZ_AFAM01000014.1 :c59116-58358     | Propionibacterium_humerusii     | Species | 759  | Mb,Oc                      |
| gi 395203061 ref NZ_AFAM01000001.1 :c244616-243831   | Propionibacterium_humerusii     | Species | 786  | Ea,Vf                      |
| gi 395205346 ref NZ_AFAM01000017.1 :c655204-654380   | Propionibacterium_humerusii     | Species | 825  | Vf                         |
| gi 395203061 ref NZ_AFAM01000001.1 :c34216-33161     | Propionibacterium_humerusii     | Species | 1056 | Fh,Hp                      |
| gi 395203690 ref NZ_AFAM01000005.1 :7982-10204       | Propionibacterium_humerusii     | Species | 2223 | Ac,Al,Ba,Fh,Ra             |
| gi 335054520 ref NZ_AFIL01000051.1 :c25042-24929     | Propionibacterium_sp_434_HC2    | Species | 114  | Al,Ba,Ch,Fh,Hp,Mb,Vf       |
| gi 335052938 ref NZ_AFIL01000004.1 :4461-4578        | Propionibacterium_sp_434_HC2    | Species | 118  | Oc                         |
| gi 335054139 ref NZ_AFIL01000041.1 :c77880-77749     | Propionibacterium_sp_434_HC2    | Species | 132  | Al,Fh,Oc                   |
| gi 335053207 ref NZ_AFIL01000016.1 :c75436-75296     | Propionibacterium_sp_434_HC2    | Species | 141  | Al,Ba,Ch,Ea,Hp,Id,Oc,Ra,Vf |
| gi 335054309 ref NZ_AFIL01000044.1 :65842-65994      | Propionibacterium_sp_434_HC2    | Species | 153  | Ac,Ea,Hp,Id,Mb,Ra          |
| gi 335055158 ref NZ_AFIL01000073.1 :155425-155610    | Propionibacterium_sp_434_HC2    | Species | 186  | Ba,Fh                      |
| gi 335053104 ref NZ_AFIL01000010.1 :c43071-42837     | Propionibacterium_sp_434_HC2    | Species | 235  | Ch,Ea,Id,Mb,Oc,Vf          |
| gi 335054434 ref NZ_AFIL01000047.1 :12103-12642      | Propionibacterium_sp_434_HC2    | Species | 540  | Fh,Mb,Oc                   |
| gi 355707189 ref NZ_JH376566.1 :236054-236590        | Propionibacterium_sp_5_U_42AFAA | Species | 537  | Ba,Ch,Ea,Mb,Ra             |
| gi 514979630 ref NZ_KE340299.1 :c1519736-1517826     | Propionibacterium_sp_HGH0353    | Species | 1911 | Id                         |
| gi 550737965 gb AXMM01000001.1 :c339754-339413       | Propionibacterium_sp_KPL1844    | Species | 342  | Al,Ba,Fh,Hp,Id,Ra,Vf       |
| gi 552897361 ref NZ_AXMI01000006.1 :1-107            | Propionibacterium_sp_KPL1854    | Species | 107  | Id                         |
| gi 552897324 ref NZ_AXMI01000005.1 :788-1104         | Propionibacterium_sp_KPL1854    | Species | 317  | Id                         |
| gi 552896371 ref NZ_AXMI01000002.1 :767403-767774    | Propionibacterium_sp_KPL1854    | Species | 372  | Al,Ea,Fh,Hp,Id,Ra          |
| gi 552879811 ref NZ_AXME01000001.1 :c1820429-1820292 | Propionibacterium_sp_KPL2008    | Species | 138  | Ac,Hp                      |
| gi 552879811 ref NZ_AXME01000001.1 :1431752-1431913  | Propionibacterium_sp_KPL2008    | Species | 162  | Id,Vf                      |
| gi 552879811 ref NZ_AXME01000001.1 :865400-865597    | Propionibacterium_sp_KPL2008    | Species | 198  | Ra                         |

|                                                    |                              |         |     |             |
|----------------------------------------------------|------------------------------|---------|-----|-------------|
| gi 552879811 ref NZ_AXME01000001.1 :655649-655855  | Propionibacterium_sp_KPL2008 | Species | 207 | Al,Pc       |
| gi 552879811 ref NZ_AXME01000001.1 :c590861-590655 | Propionibacterium_sp_KPL2008 | Species | 207 | Id,Mb,Vf    |
| gi 552879811 ref NZ_AXME01000001.1 :990664-990933  | Propionibacterium_sp_KPL2008 | Species | 270 | Ba,Mb       |
| gi 552879811 ref NZ_AXME01000001.1 :c31864-31571   | Propionibacterium_sp_KPL2008 | Species | 294 | Al,Ch,Mb,Oc |

---

**Table S5. Conditional logistic regression odds ratios**

| Variable                   | Odds Ratio | Lower 0.95 CI | Upper 0.95 CI | P-value  |     |
|----------------------------|------------|---------------|---------------|----------|-----|
| Ear (Ea)                   | 0.38208    | 0.2204        | 0.6624        | 0.00061  | *** |
| Inguinal crease (Ic)       | 0.71288    | 0.3835        | 1.3252        | 0.28466  |     |
| Antecubital fossa (Ac)     | 0.67541    | 0.4002        | 1.1398        | 0.141588 |     |
| Forehead (Fh)              | 0.72778    | 0.437         | 1.212         | 0.222048 |     |
| Alar crease (Al)           | 1.20796    | 0.7315        | 1.9947        | 0.460331 |     |
| Retroauricular crease (Ra) | 0.84233    | 0.4904        | 1.4468        | 0.534128 |     |
| Popliteal fossa (Pc)       | 0.72593    | 0.393         | 1.3409        | 0.306279 |     |
| Back (Ba)                  | 1.56281    | 0.8981        | 2.7194        | 0.114143 |     |
| Cheek (Ch)                 | 1.90783    | 1.0653        | 3.4166        | 0.029789 | *   |
| Manubrium (Mb)             | 2.64197    | 1.4895        | 4.6861        | 0.000891 | *** |
| Interdigital web (Id)      | 1.83754    | 0.9833        | 3.4341        | 0.056518 | .   |
| Hypothenar palm (Hp)       | 2.60042    | 1.3892        | 4.8678        | 0.002813 | **  |
| Volar forearm (Vf)         | 2.16785    | 1.0624        | 4.4236        | 0.033483 | *   |
| Presence/Absence           | 0.71797    | 0.5736        | 0.8987        | 0.003816 | **  |
| RMLR w/AttSelect           | 0.78406    | 0.5726        | 1.0736        | 0.129276 |     |
| 1NN                        | 0.84402    | 0.6148        | 1.1587        | 0.294287 |     |
| RMLR                       | 1.0422     | 0.7527        | 1.443         | 0.803371 |     |

Reference variables - Occiput (Oc), Nucleotide Diversity (ND), 1NN w/AttSelect

Significance codes - p<0.001 '\*\*\*', p<0.01 '\*\*', p<0.05 '\*', p<0.1 '.'
